# Supplementary material for: Marine Heat Waves Are Transforming Western Mediterranean Marine Ecosystems
Source: Research Square preprint supplement (doi:10.21203/rs.3.rs-7573187/v1), 2025-10-01
Supplement: Supplementary file 1 [file 4e48341025ab41f849a9fa88.pdf]

# **Supplementary Material: Marine Heat Waves Are Transforming the Western Mediterranean Marine Ecosystems**

Camila Artana<sup>\*1</sup>, Andrea Kaplan<sup>2,3\*</sup>, Francisco Ramirez<sup>2</sup>, Miquel Ortega<sup>2</sup>, Jeroen Gerhard Steenbeek<sup>4</sup>  
and Marta Coll<sup>2,4</sup>

\* Camila Artana and Andrea Kaplan contributed equally to this work.

## **Affiliations:**

<sup>1</sup> Laboratoire LOCEAN-IPSL, Sorbonne Université (UPMC, Université Paris 6), CNRS, IRD, MNHN, Paris, France

<sup>2</sup> Institute of Marine Science (ICM-CSIC), Barcelona, Spain

<sup>3</sup> Universitat Autònoma de Barcelona (UAB), Barcelona, Spain

<sup>4</sup> Ecopath International Initiative (EII), Barcelona, Spain

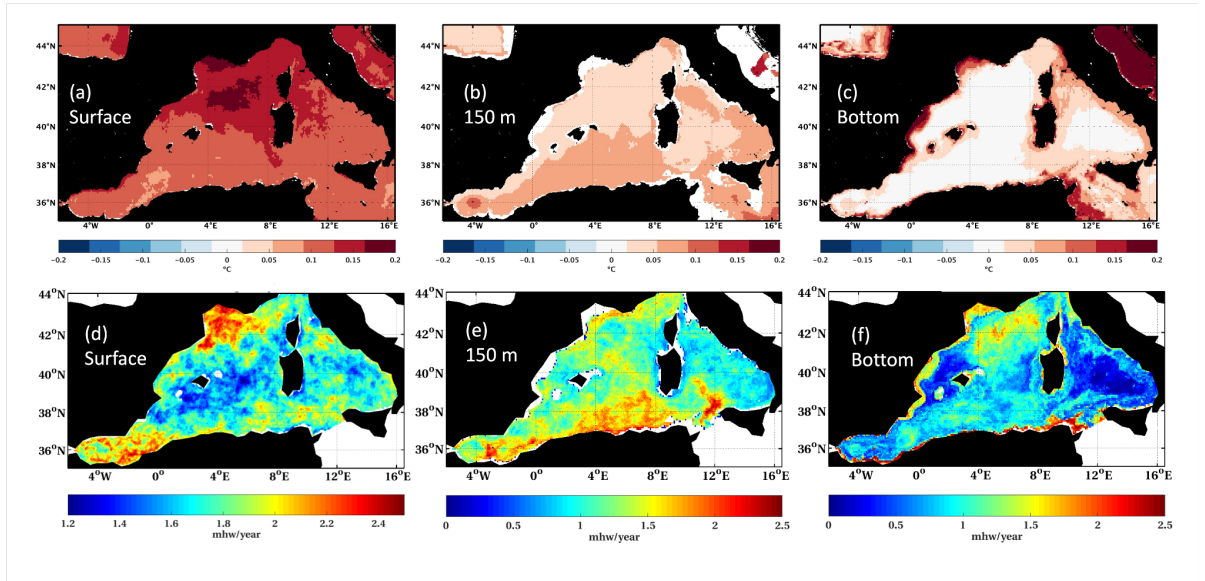

Figure S1: (a–b) Temperature difference between GLORYS12 outputs and temperature inputs for the control scenario in which MHWs were removed (d–e) Frequency of MHWs at each depth, expressed as the number of events per year (h–j).

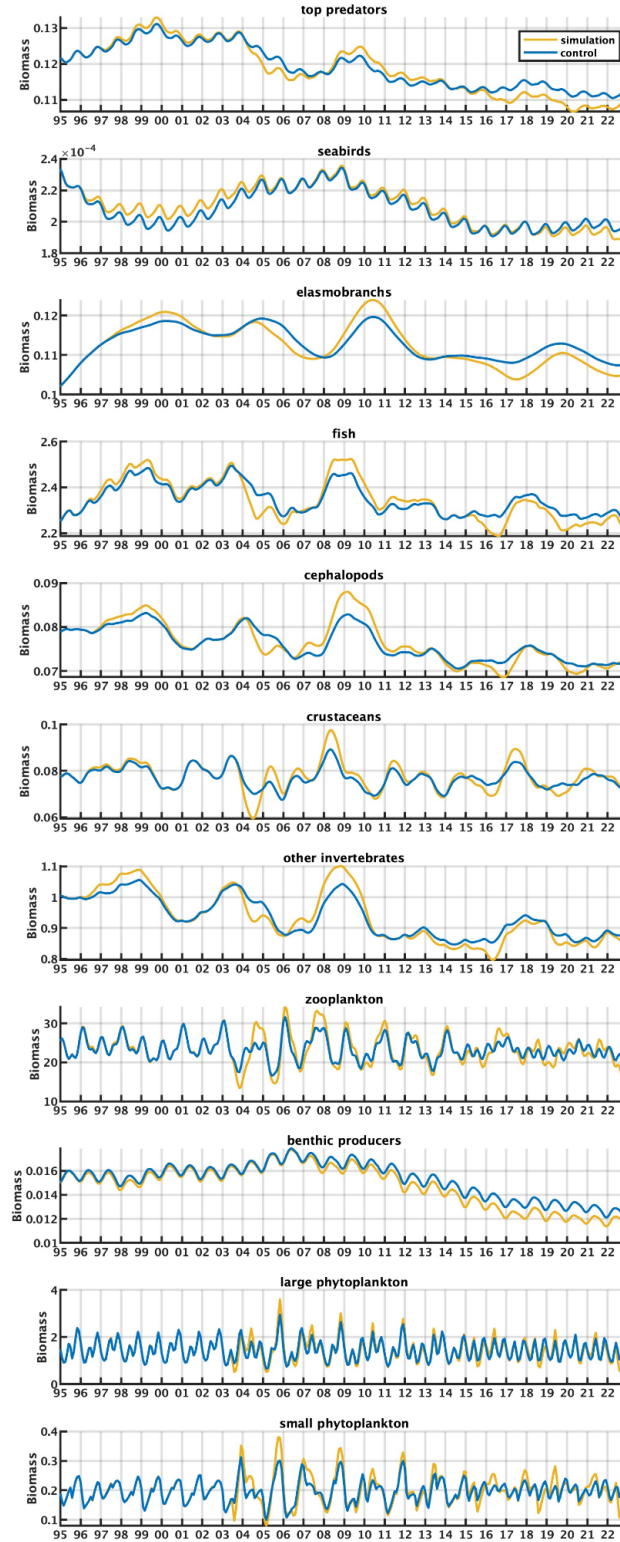

Figure S2: Time series of biomass (t/km<sup>2</sup>) for each functional group obtained with the simulation with (yellow) and without (blue) MHWs.

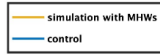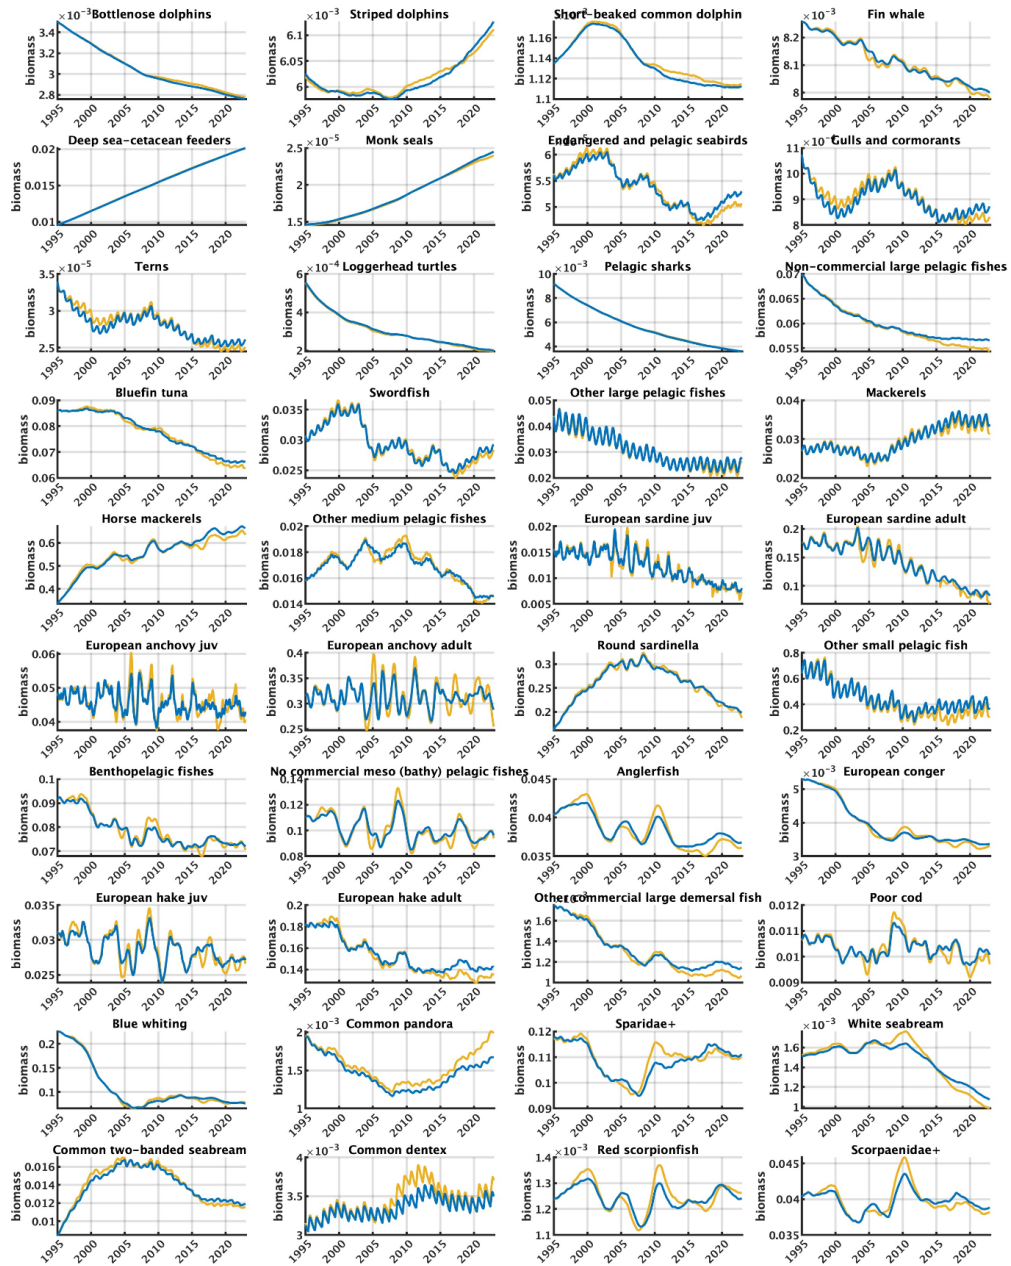



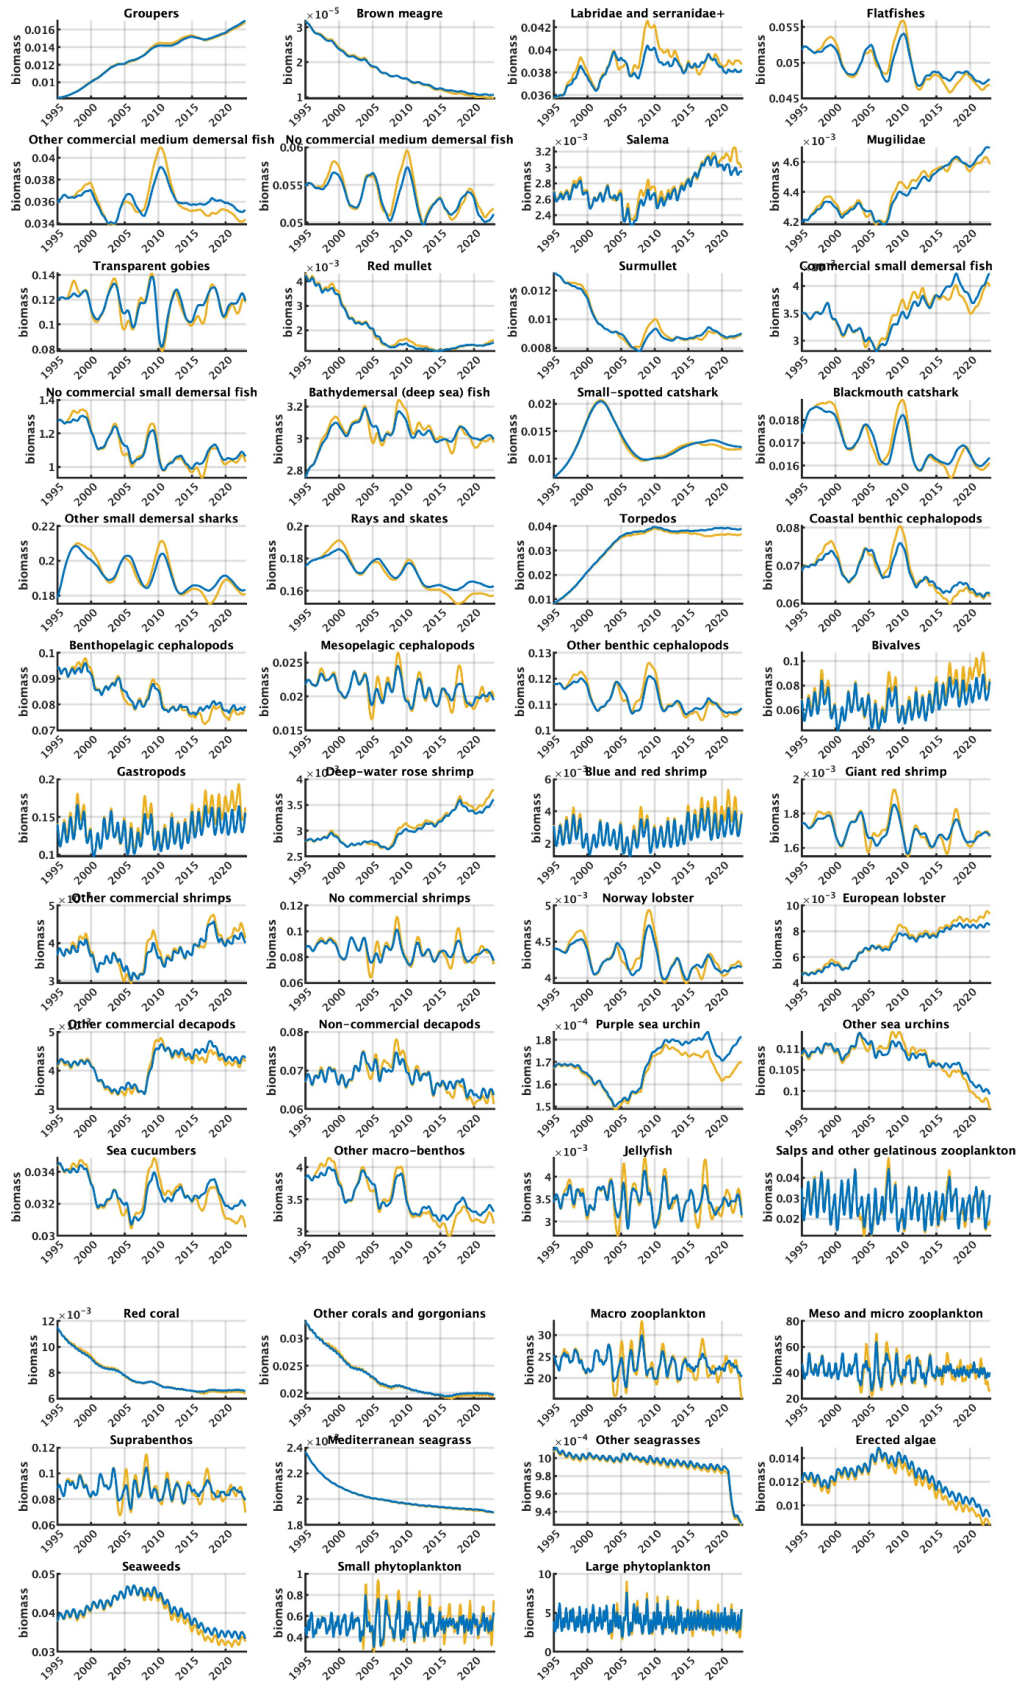

Figure S3: Time series of biomass ( $\text{t}/\text{km}^2$ ) for each individual group obtained with the simulation with (yellow) and without (blue) MHWs.

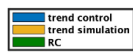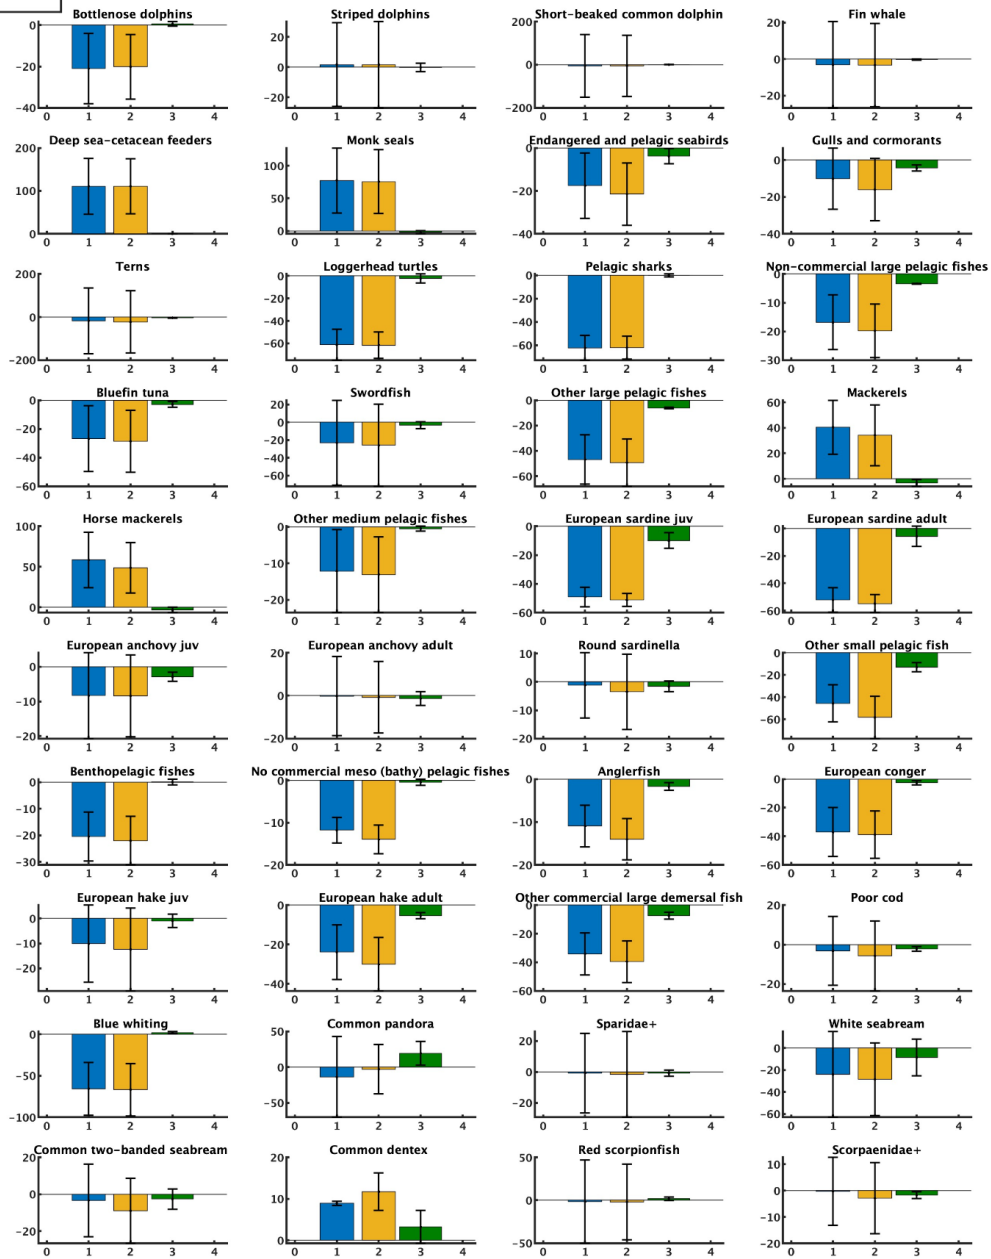

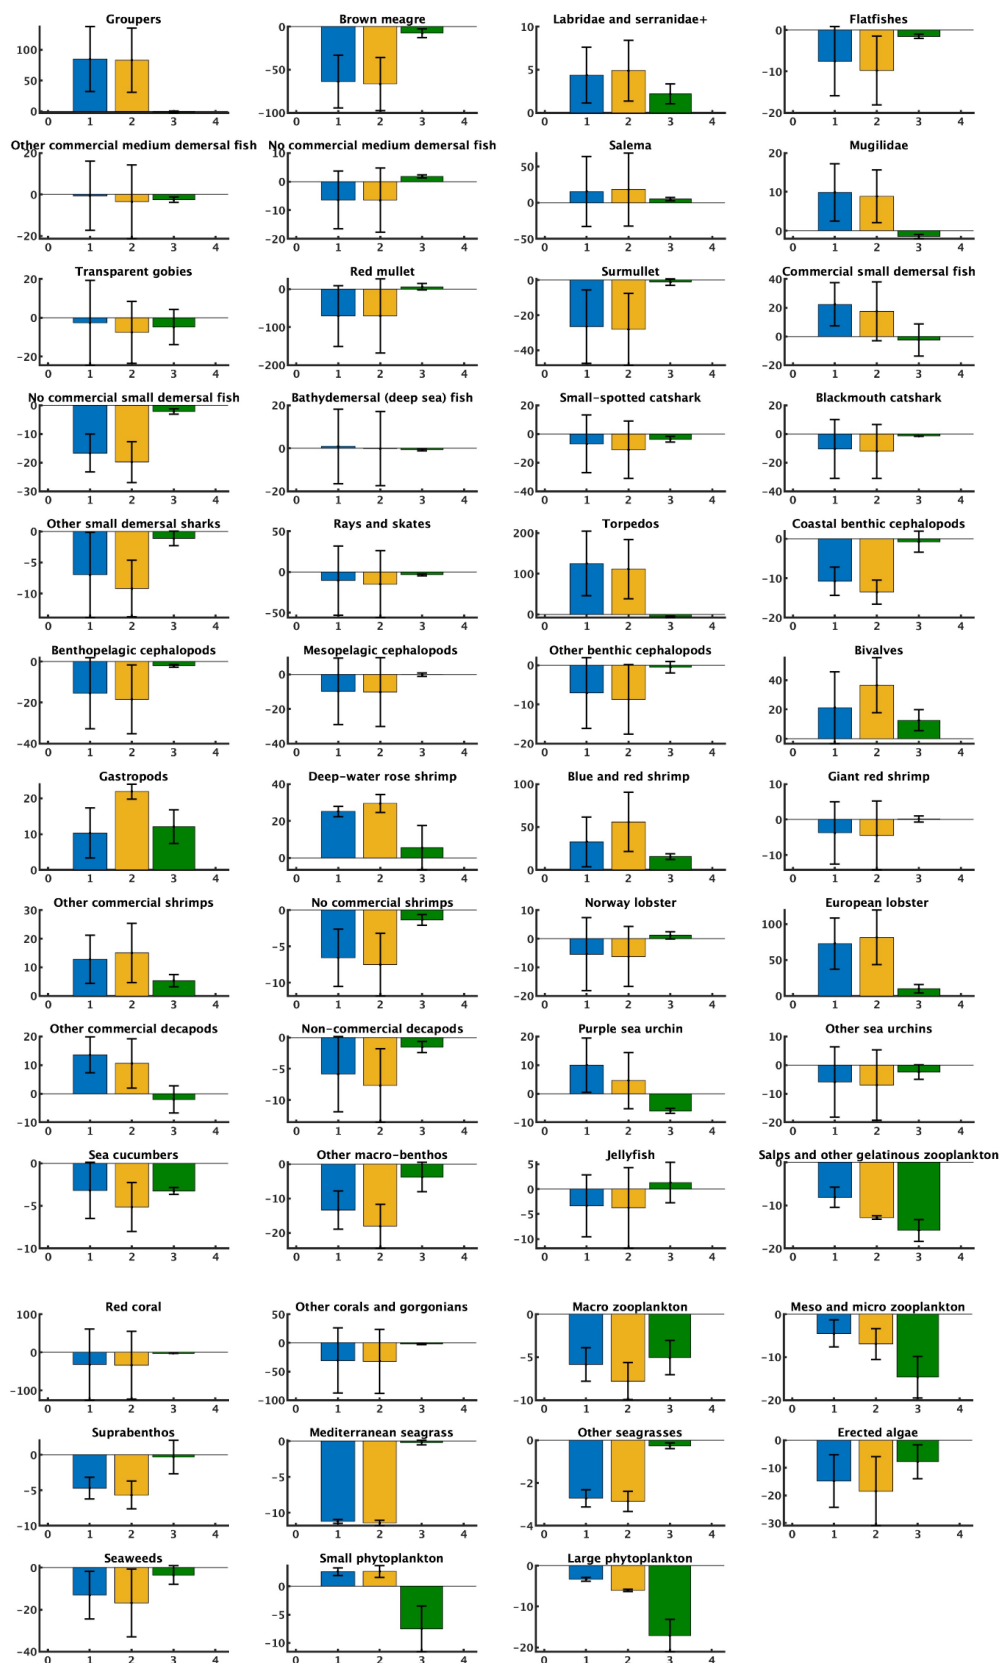

Figure S4: Historical trend in Biomass for each individual group expressed as a percentage for the simulations with (yellow bars) and without (blue bars) MHWs. The RC for individual groups averaged over the final year of the simulation is represented by a green bar.

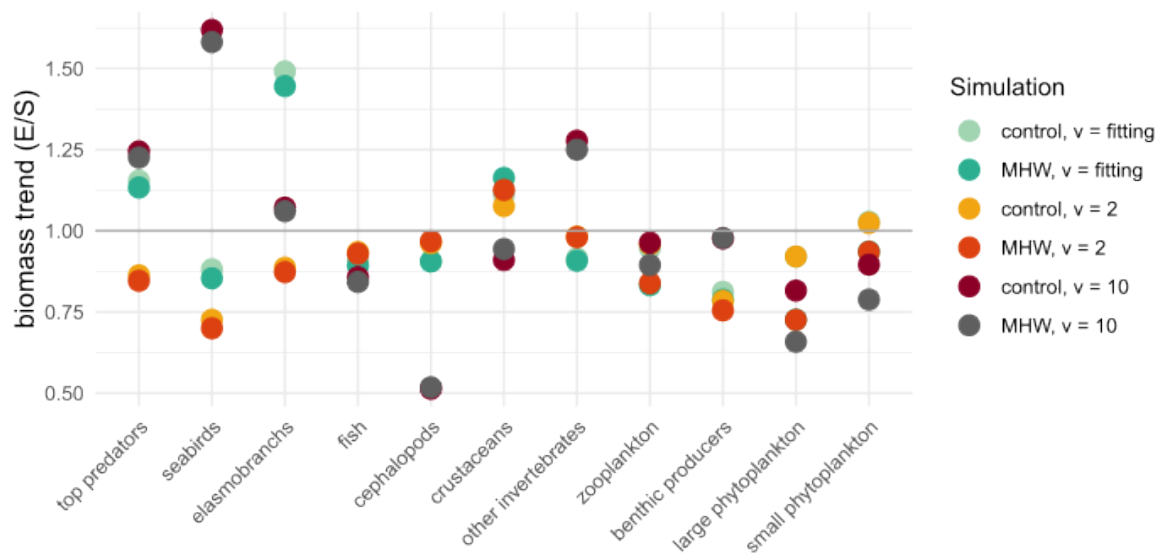

Figure S5. Initial/final biomass ratio for each species group under each model simulation (control simulations and MHW simulations with three different vulnerability values, represented by the different colours shown in the legend).

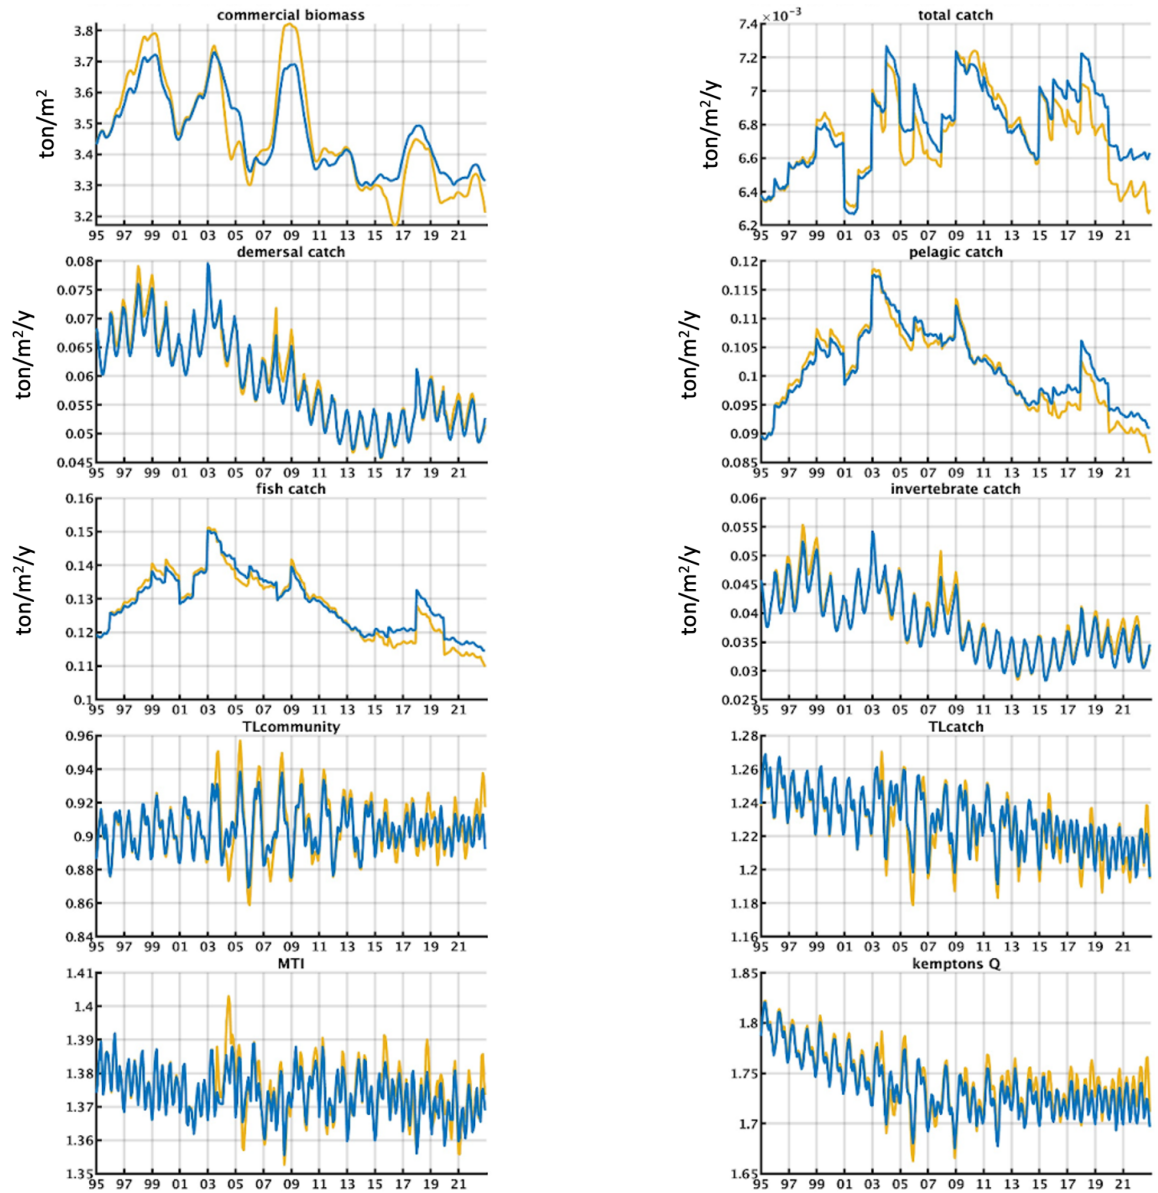

Figure S6: Time series of the ecological indicators obtained with the simulation with (yellow) and without (blue) MHWs.

In order to distinguish the different vertical and temporal behaviour of MHWs we selected 3 five-year periods with markedly different MHW patterns: 1995-2000, 2003-2008 and 2017-2022. Maps of temperature MHW frequency, and absolute temperature during MHWs averaged over the period 2017–2022 reveal marked contrasts compared to earlier periods (1995–2000 and 2003–2008) (Figures S7, and S8). During the most recent period the highest absolute temperatures during MHWs were observed in the north at the surface ( $\sim 25^{\circ}\text{C}$ ) and in the south at 150 m depth ( $\sim 15^{\circ}\text{C}$ ) (Figure S7). Maps of MHWs frequency show that MHWs were much more frequent during the last period (Figure S8). At the surface, the northern part of the basin showed a frequency of 6 MHWs per year, being even more frequent at 150 m. This stands in stark contrast to the frequency of MHWs observed during the periods 2003–2008 and 1995–2003, which did not exceed 2 MHWs per year.

When comparing the maximum intensities of MHW events through the three periods, we observe that the latitudinal temperature gradient between the cooler north and warmer south tends to diminish during extreme events (Figure S9). In fact, maximum surface temperatures during MHWs reach values around  $30^{\circ}\text{C}$  in the northern part of the basin, comparable to those from the south. These patterns suggest that, starting from 2003 and particularly during the 2017–2022 period, during MHW events the thermal structure of the western Mediterranean was strongly altered. During such events, surface conditions in the northern basin increasingly resembled those of the southern region.



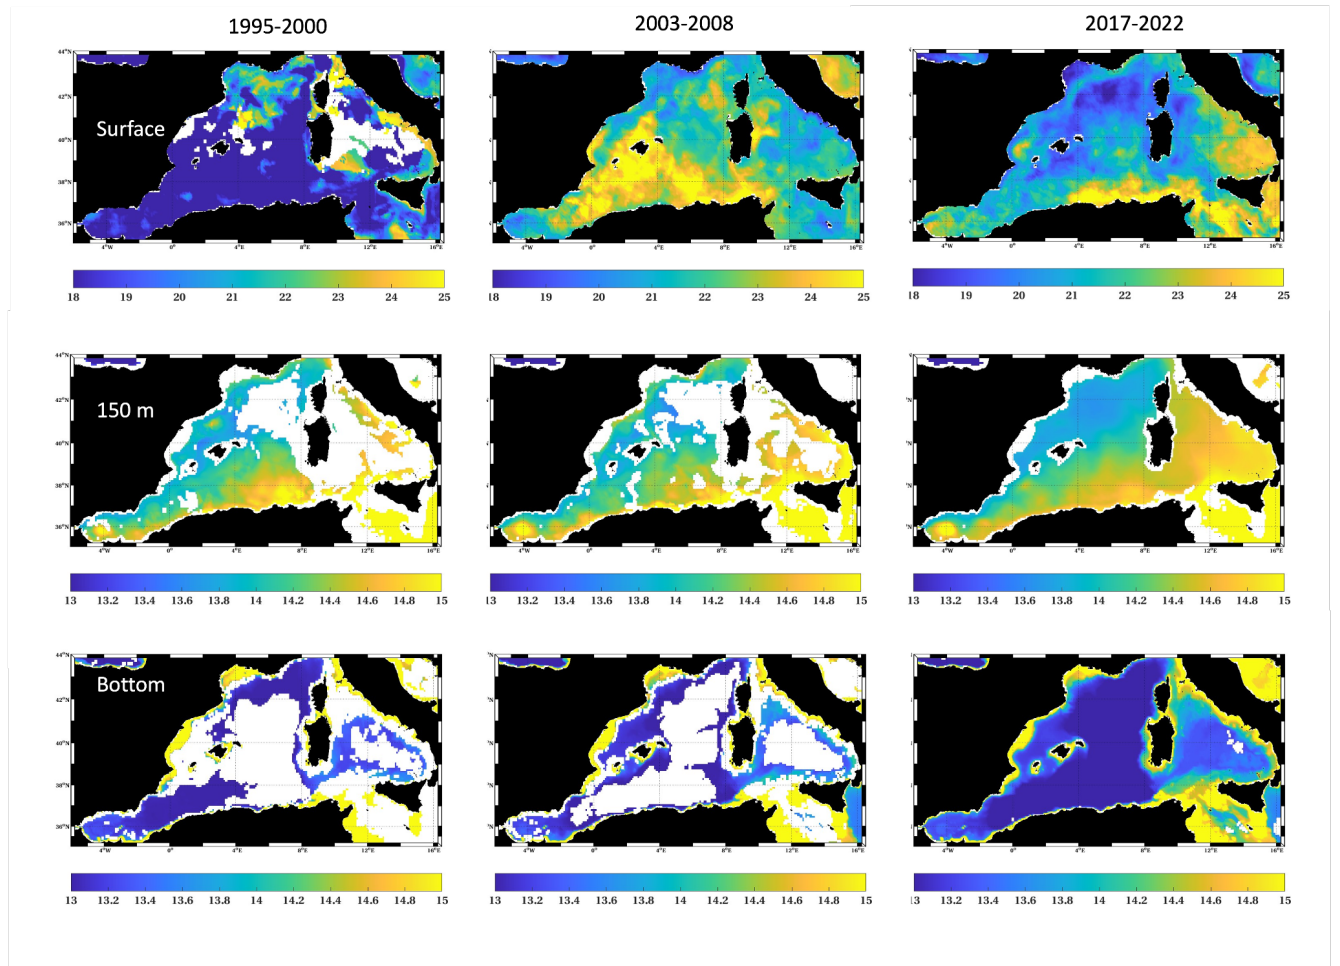

Figure S7: Mean absolute temperature during MHW events at the surface, 150 m, and bottom depths over the period 1995–2000, 2003–2008 and 2017–2022.



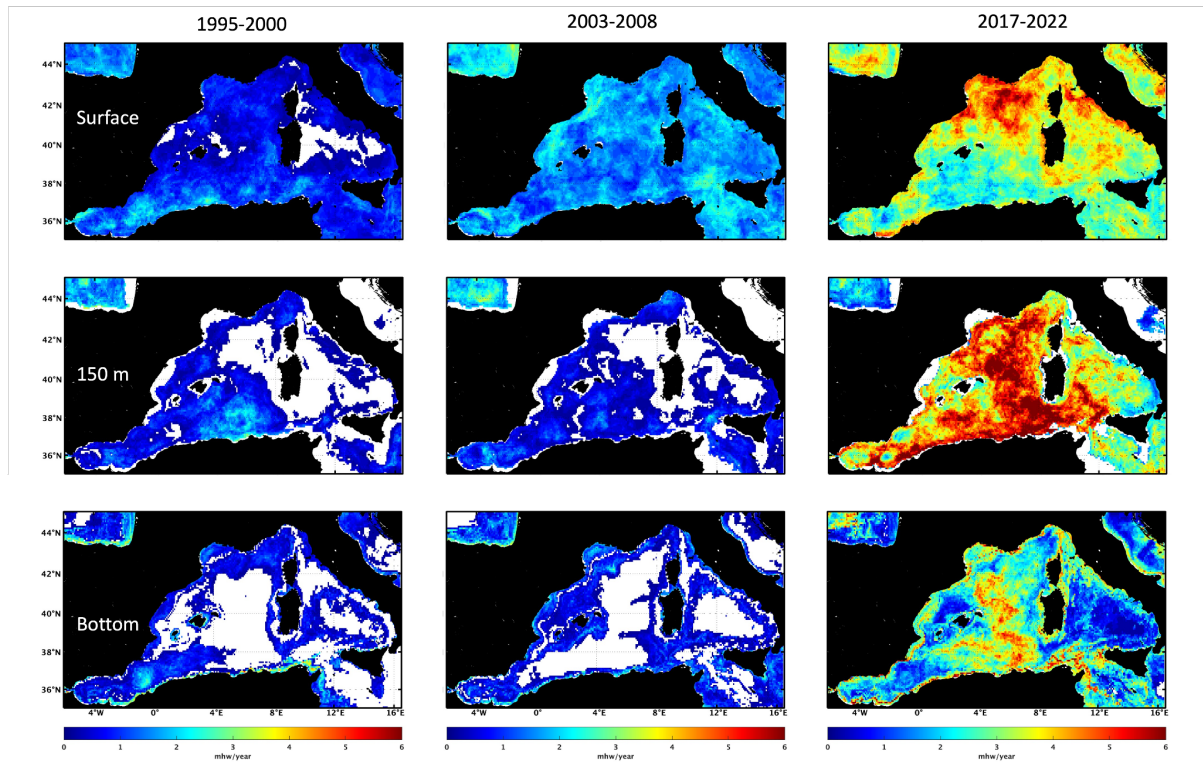

Figure S8: Frequency of MHW events at the surface, 150 m, and bottom depths over the period 1995–2000, 2003–2008 and 2017–2022.

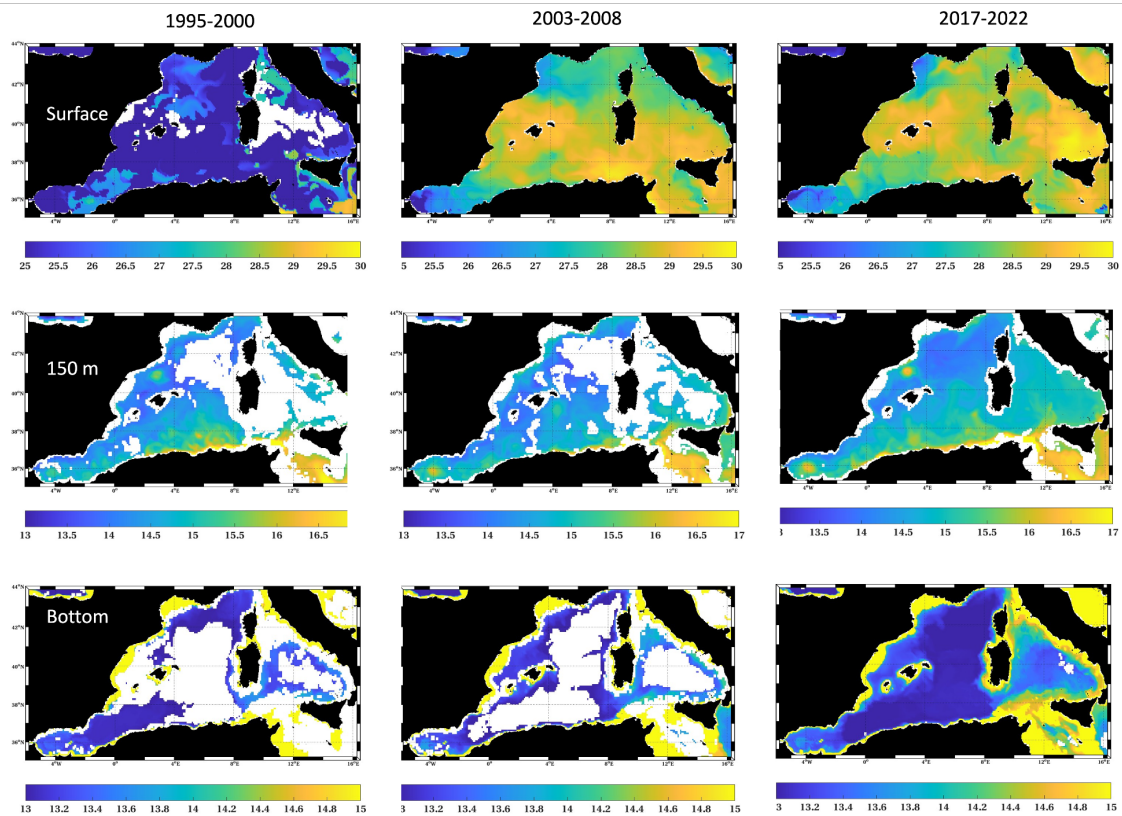

Figure S9: Maximum MHW intensity at the surface, 150 m, and bottom depths over the period 1995–2000, 2003–2008 and 2017–2022.

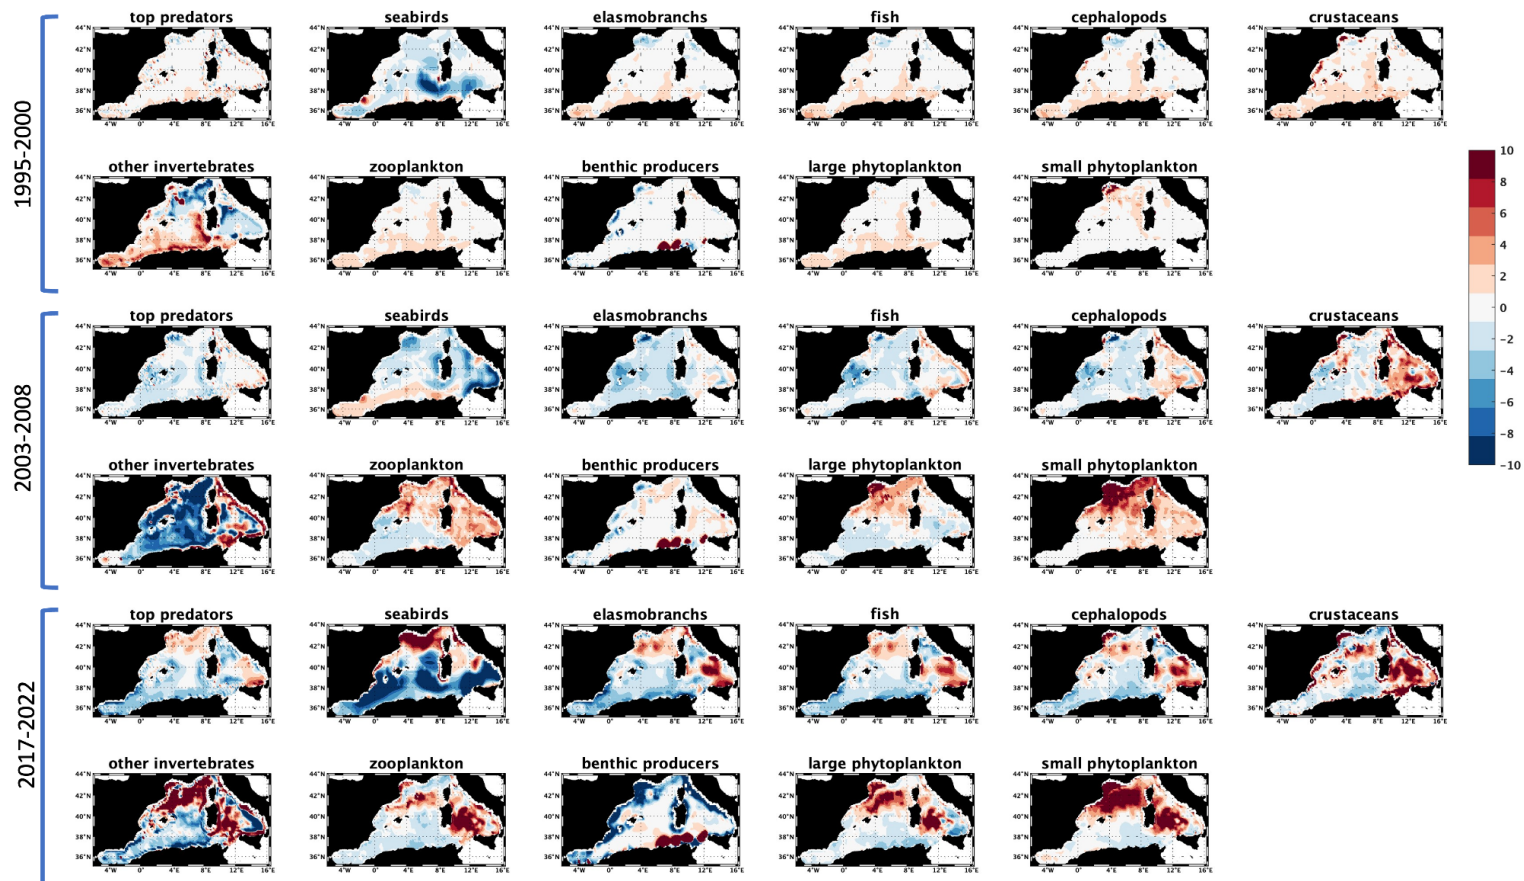

Figure S10: Mean rate of change of biomass computed for each period (1995-2000, 2003-2008 and 2017-2022) and for each functional group.

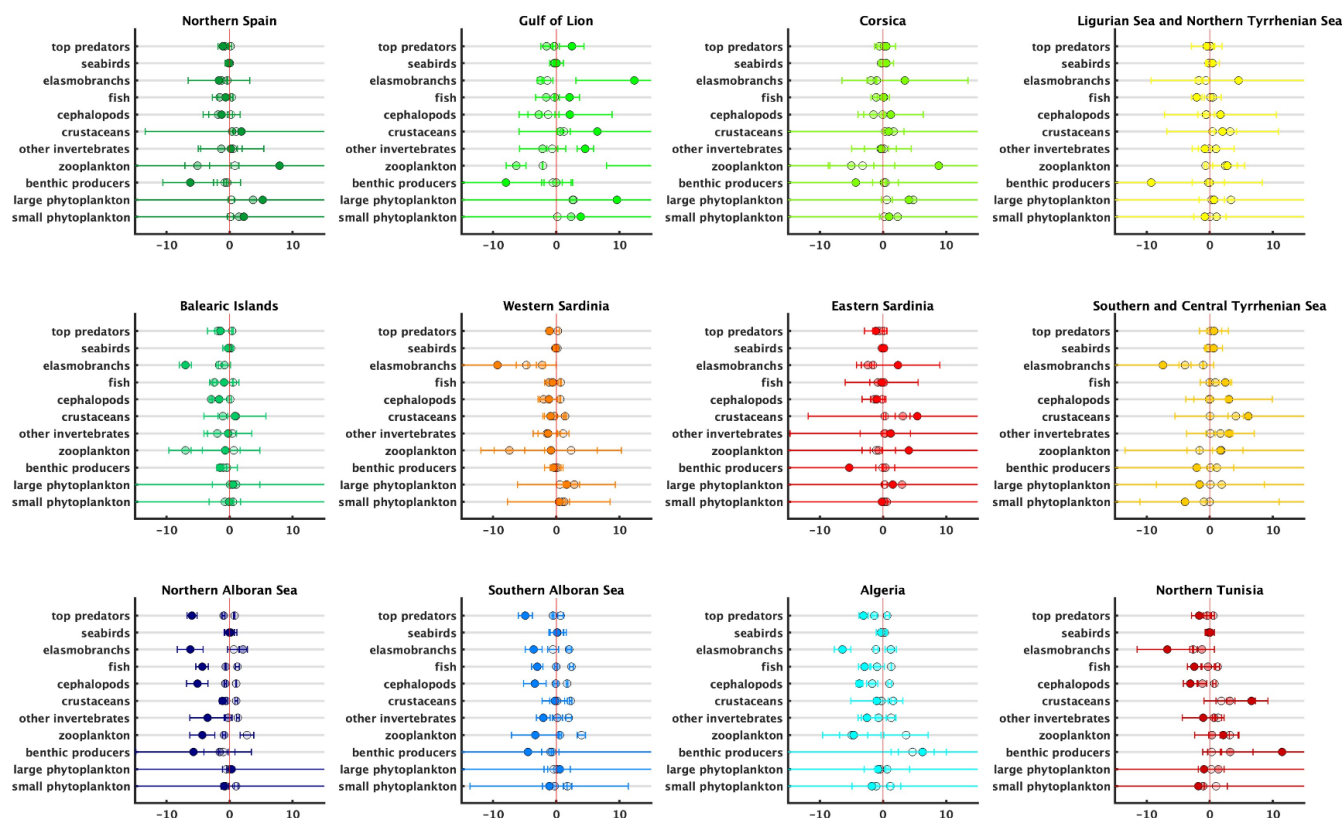

Figure S11: Lollipop plots illustrating the rate of change in biomass for each functional group within each GSA. Coloured dots (same colour code as in Figure 4) represent mean values of the rate of change for three distinct periods: 1995–2000, 2003–2008, and 2017–2022 and bars the corresponding errors.

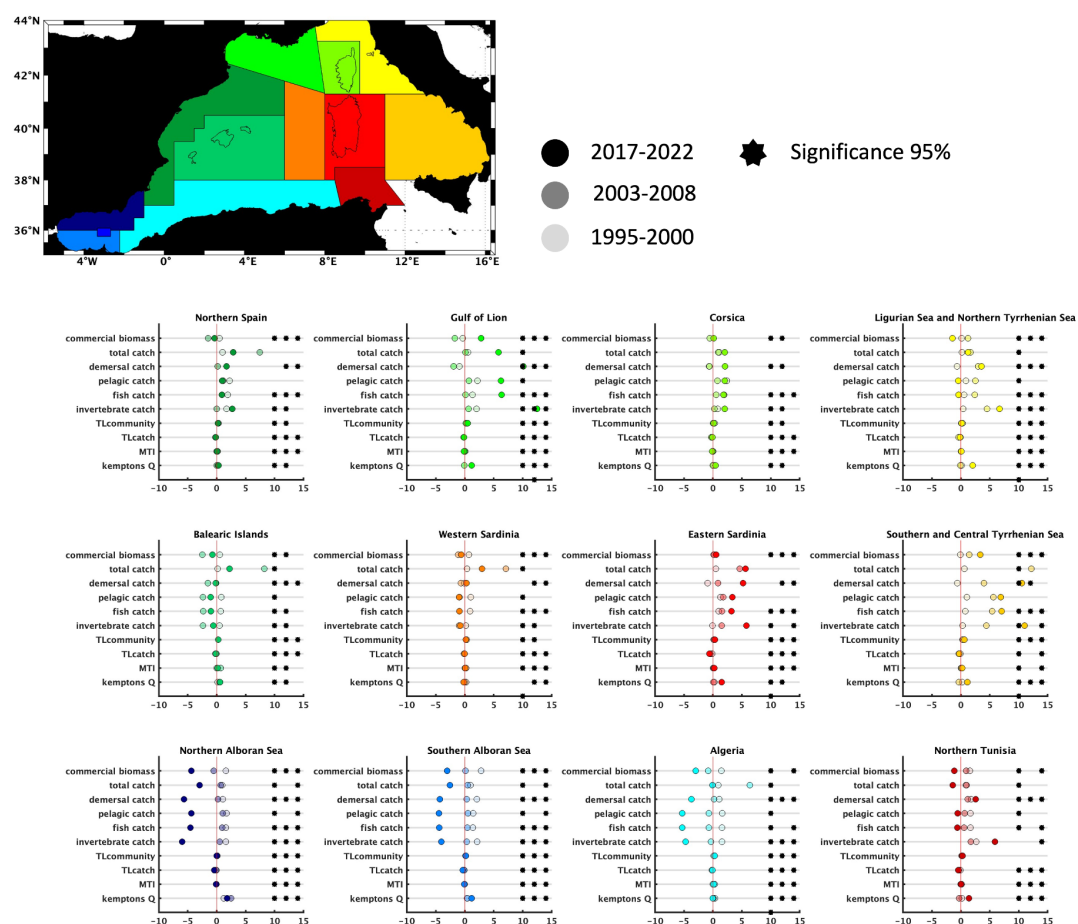

Figure S12: Lollipop plots illustrating the rate of change in indicators within each GSA. Coloured dots represent mean values of the rate of change for three distinct periods: 1995–2000, 2003–2008, and 2017–2022. Asterisks (\*) indicate values that are significantly different from the mean over the entire period (1995–2022) at the 95% confidence level. The position of each asterisk corresponds to a specific period: first position for 1995–2000, second for 2003–2008, and third for 2017–2022.



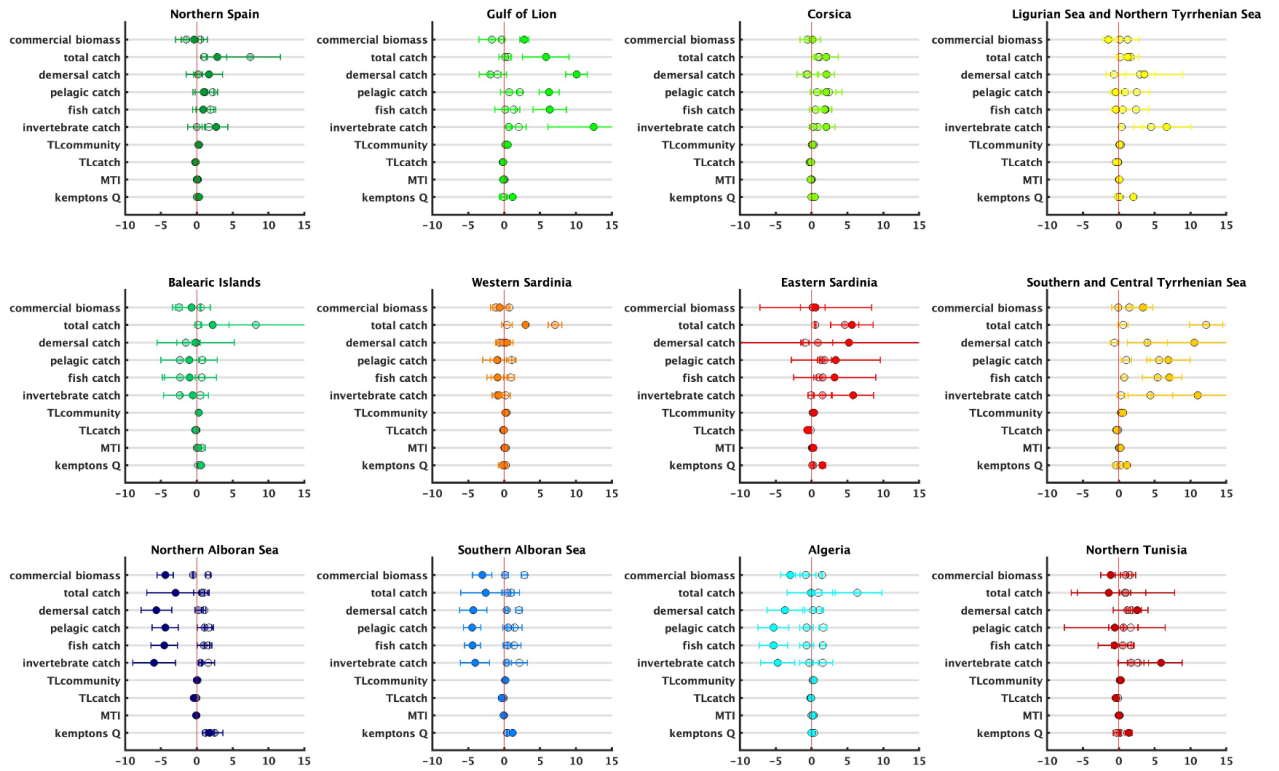

Figure S13 Lollipop plots illustrating the rate of change in ecosystem indicators within each GSA. Coloured dots represent mean values of the rate of change for three distinct periods: 1995–2000, 2003–2008, and 2017–2022 and bars the corresponding errors.

| Modelled species                           | Assigned temperature layer | Functional Group            |
|--------------------------------------------|----------------------------|-----------------------------|
| Bottlenose dolphins                        | 150 m                      | Top predators               |
| Striped dolphins                           | 150 m                      | Top predators               |
| Short-beaked common dolphin                | 150 m                      | Top predators               |
| Fin whale                                  | 150 m                      | Top predators               |
| Deep sea-cetacean feeders                  | 150 m                      | Top predators               |
| Monk seals                                 | 150 m                      | Top predators               |
| Endangered and pelagic seabirds            | Surface                    | Top predators/Seabirds      |
| Gulls and cormorants                       | Surface                    | Top predators/Sea birds     |
| Terns                                      | Surface                    | Seabirds                    |
| Loggerhead turtles                         | 150 m                      | Top predators               |
| Pelagic sharks                             | Surface                    | Top predators/Elasmobranchs |
| Non-commercial large pelagic fishes        | Surface                    | Fish                        |
| Bluefin tuna                               | Surface                    | Top predators/Fish          |
| Swordfish                                  | Surface                    | Top predators/Fish          |
| Other large pelagic fishes                 | Surface                    | Top predators/Fish          |
| Mackerels                                  | Surface                    | Fish                        |
| Horse mackerels                            | Surface                    | Fish                        |
| Other medium pelagic fishes                | Surface                    | Top predators/Fish          |
| European sardine juv                       | Surface                    | Fish                        |
| European sardine adult                     | Surface                    | Fish                        |
| European anchovy juv                       | Surface                    | Fish                        |
| European anchovy adult                     | Surface                    | Fish                        |
| Round sardinella                           | Surface                    | Fish                        |
| Other small pelagic fish                   | Surface                    | Fish                        |
| Benthopelagic fishes                       | 150                        | Fish                        |
| Non commercial meso (bathy) pelagic fishes | 150                        | Fish                        |
| Anglerfish                                 | Bottom                     | Top predators/ Fish         |
| European conger                            | Bottom                     | Top predators/Fish          |
| European hake juvenile                     | Bottom                     | Fish                        |
| European hake adult                        | 150 m                      | Top predators/Fish          |
| Other commercial large demersal fish       | Bottom                     | Top predators/Fish          |
| Poor cod                                   | Bottom                     | Fish                        |

|                                       |        |                             |
|---------------------------------------|--------|-----------------------------|
| Blue whiting                          | Bottom | Fish                        |
| Common pandora                        | Bottom | Fish                        |
| Sparidae+                             | Bottom | Fish                        |
| White seabream                        | Bottom | Fish                        |
| Common two-banded seabream            | Bottom | Fish                        |
| Common dentex                         | Bottom | Top predators/Fish          |
| Red scorpionfish                      | Bottom | Top predators/ Fish         |
| Scorpaenidae+                         | Bottom | Fish                        |
| Groupers                              | Bottom | Fish                        |
| Brown meagre                          | Bottom | Fish                        |
| Labridae and serranidae+              | Bottom | Fish                        |
| Flatfishes                            | Bottom | Fish                        |
| Other commercial medium demersal fish | Bottom | Fish                        |
| No commercial medium demersal fish    | Bottom | Fish                        |
| Salema                                | Bottom | Fish                        |
| Mugilidae                             | Bottom | Fish                        |
| Transparent gobies                    | Bottom | Fish                        |
| Red mullet                            | Bottom | Fish                        |
| Surmullet                             | Bottom | Fish                        |
| Commercial small demersal fish        | Bottom | Fish                        |
| No commercial small demersal fish     | Bottom | Fish                        |
| Bathymersal (deep sea) fish           | Bottom | Fish                        |
| Small-spotted catshark                | Bottom | Top predators/Elasmobranchs |
| Blackmouth catshark                   | Bottom | Top predators/Elasmobranchs |
| Other small demersal sharks           | Bottom | Elasmobranchs               |
| Rays and skates                       | Bottom | Elasmobranchs               |
| Torpedos                              | Bottom | Top predators/Elasmobranchs |
| Coastal benthic cephalopods           | Bottom | Cephalopods                 |
| Benthopelagic cephalopods             | 150m   | Cephalopods                 |
| Mesopelagic cephalopods               | 150 m  | Cephalopods                 |
| Other benthic cephalopods             | Bottom | Cephalopods                 |
| Bivalves                              | Bottom | Other invertebrates         |
| Gastropods                            | Bottom | Other invertebrates         |



|                                        |         |                     |
|----------------------------------------|---------|---------------------|
| Deep-water rose shrimp                 | Bottom  | crustaceans         |
| Blue and red shrimp                    | Bottom  | crustaceans         |
| Giant red shrimp                       | Bottom  | crustaceans         |
| Other commercial shrimps               | Bottom  | crustaceans         |
| No commercial shrimps                  | Bottom  | crustaceans         |
| Norway lobster                         | Bottom  | crustaceans         |
| European lobster                       | Bottom  | crustaceans         |
| Other commercial decapods              | Bottom  | crustaceans         |
| Non-commercial decapods                | Bottom  | crustaceans         |
| Purple sea urchin                      | Bottom  | Other invertebrates |
| Other sea urchins                      | Bottom  | Other invertebrates |
| Sea cucumbers                          | Bottom  | Other invertebrates |
| Other macro-benthos                    | Bottom  | Other invertebrates |
| Jellyfish                              | Surface | Other invertebrates |
| Salps and other gelatinous zooplankton | Surface | Other invertebrates |
| Red coral                              | Surface | Other invertebrates |
| Other corals and gorgonians            | Surface | Other invertebrates |
| Macro zooplankton                      | Bottom  | Zooplankton         |
| Meso and micro zooplankton             | Bottom  | Zooplankton         |
| Suprabenthos                           | Bottom  | crustaceans         |
| Mediterranean seagrass                 | Bottom  | Benthic producers   |
| Other seagrasses                       | Bottom  | Benthic producers   |
| Erected algae                          | Bottom  | Benthic producers   |
| Seaweeds                               | Bottom  | Benthic producers   |
| Small phytoplankton                    | Surface | Small phytoplankton |
| Large phytoplankton                    | Surface | Large phytoplankton |
| Detritus                               | -       | -                   |
| Discards                               | -       | -                   |

**Table S1:** Species included in each functional group and the temperature level assigned to each species.
